# Supplementary material
Source: PubMed Central journal article supplement (PMC3547224)
Supplement: jid2012315x1.pdf [file jid2012315x1.pdf]

Supplemental Figure 1: Primers and probes designed using ProbeFinder software Version 2.45

**TNF**

| Primer | Length | start | end | Tm | GC | Sequence             |
|--------|--------|-------|-----|----|----|----------------------|
| left   | 21     | 268   | 288 | 59 | 52 | cagcctcttctcctcctgat |
| right  | 20     | 371   | 390 | 59 | 55 | gccagaggctgattagaga  |

Amplicon 123 nt:

cagcctcttctcctcctgatcgtggcaggcgccaccacgctcttctgctgctgctcactttggagtgatcgccccagagggaagagttccccaggacctctctaatcagccctctggc

Universal ProbeLibrary probe #29 (cat. no. 04687612001)

**IFN- $\gamma$**

| Primer | Length | start | end | Tm | GC | Sequence              |
|--------|--------|-------|-----|----|----|-----------------------|
| left   | 22     | 268   | 289 | 59 | 36 | ggcattttgagaattggaaag |
| right  | 21     | 359   | 379 | 59 | 43 | ttggatgctctggctcatct  |

Amplicon 112 nt:

ggcattttgagaattggaaagaggagagtgacagaaaaataatgcagagccaaatgtctcctttacttcaaacttttaaaaaacttaagatgaccagagcatccaaa

Universal ProbeLibrary probe #21 (cat. no. 04686942001)

**IL-12**

| Primer | Length | start | end | Tm | GC | Sequence            |
|--------|--------|-------|-----|----|----|---------------------|
| left   | 20     | 441   | 460 | 60 | 55 | cactccaaaacctgctgag |
| right  | 22     | 507   | 528 | 59 | 45 | tctctcagaagtcaaggta |

Amplicon 88 nt:

Cactccaaaacctgctgagggccgctcagcaacatgctccagaaggccagacaaaactctagaattttacccttgactctgaagaga

Universal ProbeLibrary probe #50 (cat. no. 04688112001)

**IL-10**

| Primer | Length | start | end | Tm | GC | Sequence                 |
|--------|--------|-------|-----|----|----|--------------------------|
| left   | 25     | 630   | 654 | 59 | 36 | cataaattagaggtctccaaatcg |
| right  | 19     | 671   | 689 | 60 | 58 | aagggctgggtcagctat       |

Amplicon 60 nt:

cataaattagaggtctccaaatcgatctgggctctgggatagctgaccagcccct

Universal ProbeLibrary probe #45 (cat. no. 04688058001)

**TGF- $\beta$**

| Primer | Length | start | end  | Tm | GC | Sequence            |
|--------|--------|-------|------|----|----|---------------------|
| left   | 18     | 1377  | 1394 | 59 | 61 | gcagcacgtggagctgta  |
| right  | 18     | 1423  | 1440 | 60 | 61 | cagccggttgctgaggtta |

Amplicon 64 nt:

gcagcacgtggagctgtaccagaaatacagcaacaattcctggcgatacctcagcaaccggctg

Universal ProbeLibrary probe #72 (cat. no. 04688953001)

**IL-13**

| Primer | Length | Position  | Tm | GC | Sequence             |
|--------|--------|-----------|----|----|----------------------|
| Left   | 18     | 137 - 154 | 59 | 61 | agccctcaggagctcat    |
| Right  | 20     | 201 - 220 | 60 | 50 | ctccataccatgctgccatt |

Amplicon (84 nt)

Agccctcaggagctcattgaggagctgtcaacatcaccagaaccagaaggctcgtctgcaatggcagcatggtatggag

Universal ProbeLibrary probe #17 (cat. no. 04686900001)

**IL-4**

| Primer | Length | Position  | Tm | GC | Sequence             |
|--------|--------|-----------|----|----|----------------------|
| Left   | 20     | 14 - 533  | 59 | 55 | caccgagttgaccgtaacag |
| Right  | 18     | 568 - 585 | 60 | 61 | gccctgcagaaggttcc    |

Amplicon (72 nt)

Caccgagttgaccgtaacagacatctttgctgcctcaagaacacaactgagaaggaacctctgcagggc

Universal ProbeLibrary probe #16 (cat. no. 04686896001)

**IL-5**

| Primer | Length | Position  | Tm | GC | Sequence            |
|--------|--------|-----------|----|----|---------------------|
| Left   | 20     | 459 - 478 | 60 | 45 | ggtttgtgcagccaaagat |
| Right  | 20     | 505 - 524 | 59 | 50 | cttgccctcattctcact  |

Amplicon (66 nt)

Ggtttgtgcagccaaagatttggaggagaaggacattttactgcagtgagaatgaggccaaga

Universal ProbeLibrary probe #25 (cat. no. 04686993001)

Supplemental Figure 2:

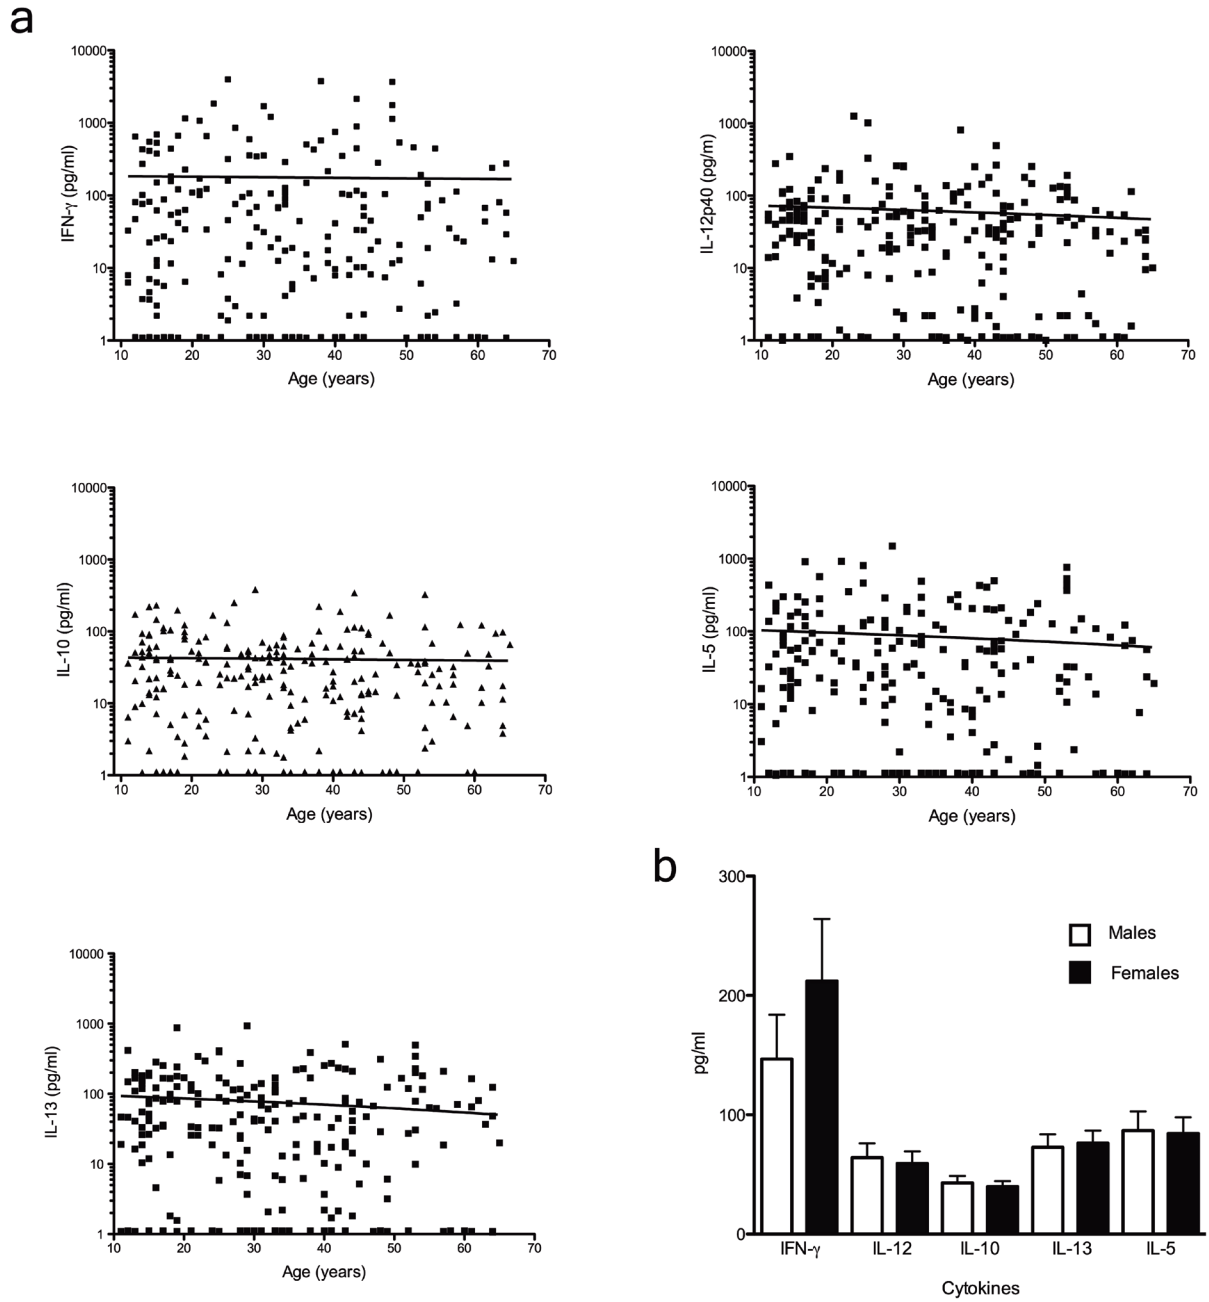

Figure S2. Correlation of cytokine levels produced by PBMCs stimulated with sand fly saliva with age (a) or gender (b) from human volunteers of a CL-endemic area in Mali.
